# Supplementary material
Source: PubMed Central journal article supplement (PMC6929385)
Supplement: baADV2019000677-suppl1.pdf [file baADV2019000677-suppl1.pdf]

# **Bone marrow oxidative stress and specific antioxidant signatures in myelodysplastic syndromes**

Frederic Picou, Christine Vignon, Christelle Debeissat, Sebastien Lachot, Olivier Kosmider, Nathalie Gallay, Amelie Foucault, Marie-Helene Estienne, Noemie Ravalet, Marie C Bene, Jorge Domenech, Emmanuel Gyan, Michaela Fontenay, and Olivier Herault

**Supplemental Table 1:** Cohort description

**Supplemental Table 2:** Description of MDS patients (IPSS-R and AO-Score)

**Supplemental Table 3:** List of transcripts, primers and probes

**Supplemental Table 4:** Statistical analyses of ROS levels in bone marrow cells (Kruskal-Wallis followed by Dunn post hoc test versus healthy control)

**Supplemental Figure 1: Flow cytometry gating strategy to quantify the ROS level in the bone marrow cell subpopulations.** CD45/SSC gating separates hematopoietic cell populations. Lymphocytic cells show the highest CD45 fluorescence intensity and the lowest SSC. Monocytic cells express slightly lower but still high amounts of CD45 and are distinguished from lymphocytes by their higher SSC. Granulocytic cells express low CD45 and broad SSC. Nucleated erythroid cells are characterized by reduced/absent CD45 expression and low SSC. The earliest cells committed to each lineage occupy a position of low-medium SSC and CD45.

**Supplemental Figure 2: Expression level of antioxidant transcripts in BM of healthy controls.** Results are expressed as  $\Delta$ Ct values vs. three housekeeping genes (*GAPDH*, *ACTB*, *B2M*), n=25. The most highly expressed transcripts are those with the lowest  $\Delta$ Ct value. The dark area delineates unexpressed transcripts.

**Supplemental Figure 3: The antioxidant score (AO-Score) is an IPSS-R independent biomarker.** Low-grade MDS patients are in green and high-grade MDS are in orange. Regression line (in red) and R<sup>2</sup> Pearson correlation values are indicated, showing that the AO-Score is not correlated with IPSS-R.

**Supplemental Table 1: Cohort description**

| <b>Patients</b>    | <b>Number<br/>(Tours/Paris)</b> | <b>Tours: median age<br/>(range)</b> | <b>Paris: median age<br/>(range)</b> | <b>Median IPSS-R<br/>(Tours/Paris)</b> | <b>Median BM blastosis<br/>(range)</b> |
|--------------------|---------------------------------|--------------------------------------|--------------------------------------|----------------------------------------|----------------------------------------|
| MDS-SLD            | 10 (4/6)                        | 74 (47-96)                           | 77 (60-81)                           | 1.3 (1.3-1.3)                          | 0.7 (0-3)                              |
| MDS-SLD-RS         | 13 (5/8)                        | 73 (59-88)                           | 81 (73-88)                           | 1.9 (2.0/1.8)                          | 0.8 (0-3)                              |
| MDS-MLD            | 29 (21/8)                       | 75 (65-82)                           | 75 (57-87)                           | 1.8 (1.8/1.8)                          | 0.9 (0-5)                              |
| MDS-MLD-RS         | 13 (10/3)                       | 80 (62-87)                           | 85 (78-93)                           | 2.3 (2.4/2.0)                          | 0.8 (0-4)                              |
| MDS-EB-1           | 13 (5/8)                        | 67 (50-82)                           | 70 (35-88)                           | 3.6 (3.0/4.0)                          | 6.2 (5-9)                              |
| MDS-EB-2           | 13 (7/6)                        | 67 (51-83)                           | 71 (44-87)                           | 5.0 (5.0/5.0)                          | 14.8 (11-19)                           |
| sAML               | 6 (6/0)                         | 71 (57-77)                           | na                                   | na                                     | 50 (26-90)                             |
| healthy volunteers | 25 (25/0)                       | 72 (61-81)                           | na                                   | na                                     | na                                     |
| Total              | 122 (83/39)                     | 74 (51-96)                           | 76 (35-93)                           | na                                     | na                                     |

na: non applicable; sAML: AML with morphologic dysplastic related changes

**Supplemental Table 2: Description of MDS patients (IPSS-R and AO-Score)**

| MDS subtype | Patient<br>(Tours: T<br>Paris: P) | Karyotype       | BM Blasts<br>(%) | Hemoglobin<br>(g/dL) | Platelets<br>(10 <sup>9</sup> /L) | ANC (10 <sup>9</sup> /L) | R_IPSS Cyto | IPSS Risk<br>Group | IPSS-R | AO-Score |
|-------------|-----------------------------------|-----------------|------------------|----------------------|-----------------------------------|--------------------------|-------------|--------------------|--------|----------|
| MDS-SLD     | P1                                | 46,XX           | 3                | 8.8                  | 55                                | 2.3                      | Good        | Int                | 3.5    | -1.71    |
|             | P2                                | 46, XX          | 1                | 11.0                 | 221                               | 3.9                      | Good        | Very low           | 1      | 0.08     |
|             | P3                                | 46,XY           | 1                | 13.0                 | 106                               | 0.5                      | Good        | Very low           | 1,5    | -3.42    |
|             | T1                                | 46,X,+15,-Y     | 0                | 7.9                  | 197                               | 2.7                      | Int         | Int                | 3,5    | 18.98    |
|             | T2                                | 46,X,-Y,+15     | 0                | 10.7                 | 119                               | 4.0                      | Int         | Low                | 2      | 1.64     |
|             | T3                                | 46,XX           | 0                | 13.5                 | 135                               | 0.9                      | Good        | Very low           | 1      | -2.12    |
|             | T4                                | 45,X,-Y         | 0                | 9.2                  | 357                               | 6.2                      | Very good   | Very low           | 1      | 1.83     |
| MDS-RS-SLD  | P4                                | 46,XY           | 1                | 9.9                  | 302                               | 2.5                      | Good        | Low                | 2      | 2.09     |
|             | P5                                | 46,XY           | 1                | 8.2                  | 165                               | 2.5                      | Good        | Low                | 2      | -4.61    |
|             | P6                                | 46,XY           | 1                | 10.8                 | 222                               | 4.9                      | Good        | Very low           | 1      | -3.24    |
|             | P7                                | 45,XY,-9        | 1                | 10.4                 | 204                               | 4.0                      | Int         | Low                | 2      | -2.16    |
|             | P8                                | 45,XX,-9        | 0                | 7.3                  | 295                               | 3.4                      | Int         | Int                | 3,5    | 3.51     |
|             | P9                                | 46,XY           | 2                | 9.9                  | 599                               | 4.2                      | Int         | Low                | 2      | 2.18     |
|             | T5                                | 47,XX,+8        | 0                | 7.7                  | 160                               | 0.9                      | Int         | Int                | 3,5    | 1.98     |
|             | T6                                | 46,XX           | 0                | 9.4                  | 187                               | 2.3                      | Good        | Low                | 2      | 2.83     |
|             | T7                                | 46,XY           | 0                | 8.7                  | 173                               | 16.1                     | Good        | Low                | 2      | 3.19     |
|             | T8                                | 46,XX           | 0                | 9.0                  | 486                               | 3.9                      | Good        | Low                | 2      | -0.74    |
| T9          | 46,XX                             | 0               | 9.3              | 545                  | 2.6                               | Good                     | Low         | 2                  | 1.71   |          |
| MDS-MLD     | P10                               | 46,XX           | 3                | 12.2                 | 219                               | 4.1                      | Good        | Low                | 2      | -0.64    |
|             | P11                               | 46,XX           | 1                | 6.2                  | 101                               | 0.1                      | Good        | Int                | 3      | 0.99     |
|             | P12                               | 46,XY           | 2                | 10.3                 | 146                               | 1.3                      | Good        | Very low           | 1      | -15.61   |
|             | P13                               | 46,XY           | 1                | 9.8                  | 122                               | 2.5                      | Good        | Low                | 2      | -3.15    |
|             | P14                               | 46,XY           | 4                | 9.4                  | 139                               | 4.5                      | Good        | Low                | 3      | -3.76    |
|             | P15                               | 45,X,-Y         | 2                | 10.1                 | 165                               | 3.7                      | Very good   | Very low           | 0      | -0.15    |
|             | P16                               | 46,XX           | 1                | 6.8                  | 176                               | 2.3                      | Good        | Low                | 2,5    | 0.92     |
|             | T10                               | 46XY            | 3                | 12.1                 | 139                               | 2.8                      | Good        | Low                | 2      | 1.17     |
|             | T11                               | 45,X,-X         | 0                | 8.9                  | 61                                | 1.6                      | Int         | Int                | 3,5    | 15.04    |
|             | T12                               | 46,XY           | 0                | 13.4                 | 21                                | 8.6                      | Good        | Low                | 2      | -1.06    |
|             | T13                               | 46,XY           | 0                | 10.3                 | 142                               | 0.4                      | Good        | Very low           | 1,5    | 1.03     |
|             | T14                               | 43,XY,-3,-7,-12 | 0                | 11.5                 | 77                                | 0.9                      | Poor        | Int                | 3,5    | -0.18    |
|             | T15                               | 46,XY           | 0                | 10.8                 | 311                               | 2.6                      | Good        | Very low           | 1      | -0.25    |
|             | T16                               | 46,XY           | 0                | 13.2                 | 186                               | 0.9                      | Good        | Very low           | 1      | 0.79     |
|             | T17                               | 46,XX           | 0                | 9.7                  | 307                               | 6.6                      | Good        | Low                | 2      | 0.42     |
|             | T18                               | 46,XY           | 0                | 11.7                 | 206                               | 0.5                      | Good        | Very low           | 1,5    | -2.19    |
|             | T19                               | 46,XX           | 0                | 10.1                 | 308                               | 2.7                      | Good        | Very low           | 1      | 2.75     |
|             | T20                               | 46,XX           | 0                | 7.2                  | 69                                | 1.7                      | Good        | Low                | 3      | 0.22     |
|             | T21                               | 47,XX,+8        | 0                | 8.8                  | 134                               | 2.8                      | Int         | Low                | 3      | 0.1      |
|             | T22                               | 45,X,-Y         | 0                | 13.7                 | 129                               | 1.9                      | Very good   | Very low           | 0      | 1.85     |
| T23         | 46,XX                             | 0               | 10.4             | 32                   | 0.3                               | Good                     | Low         | 2,5                | -1.07  |          |
| T24         | 46,XY                             | 0               | 14.7             | 71                   | 0.6                               | Good                     | Low         | 2                  | 1.23   |          |
| T25         | 46,XX                             | 0               | 8.6              | 86                   | 3.6                               | Good                     | Low         | 2,5                | 1.98   |          |
| T26         | 47,XY,+8                          | 0               | 11.7             | 104                  | 2.6                               | Int                      | Low         | 2                  | -2.62  |          |
| T27         | 46,XY                             | 0               | 11.5             | 81                   | 14.0                              | Good                     | Very low    | 1,5                | 1.2    |          |
| T28         | 46,XY,del(20q)                    | 0               | 9.6              | 155                  | 2.0                               | Good                     | Low         | 2                  | 0.87   |          |
| T29         | 46,XX                             | 0               | 13.8             | 99                   | 4.0                               | Good                     | Very low    | 1,5                | 2.29   |          |
| MDS-RS-MLD  | P17                               | 46,XX           | 1                | 7.6                  | 128                               | 2.6                      | Good        | Low                | 2,5    | -1.84    |
|             | P18                               | 46,XY           | 2                | 9.7                  | 277                               | 3.5                      | Good        | Low                | 2      | -1.29    |
|             | P19                               | 46,XX           | 1                | 8.9                  | 274                               | 1.2                      | Good        | Low                | 2      | -2.29    |
|             | P20                               | 46,XX           | 4                | 10.0                 | 159                               | 3.5                      | Good        | Low                | 2      | -0.18    |
|             | T30                               | 46,X,-Y,+7      | 0                | 9.6                  | 142                               | 18.3                     | Int         | Low                | 3      | 0.34     |
|             | T31                               | 46,XX           | 0                | 8.9                  | 436                               | 5.0                      | Good        | Low                | 2      | 2.21     |
|             | T32                               | 45,XX,-21       | 0                | 8.0                  | 92                                | 0.7                      | Int         | Int                | 4      | 4.88     |
|             | T33                               | 46,XX           | 0                | 8.7                  | 82                                | 2.2                      | Good        | Low                | 2,5    | 0.21     |
|             | T34                               | 46,XX           | 0                | 9.6                  | 244                               | 2.1                      | Good        | Low                | 2      | 0.85     |
|             | T35                               | 46,XY           | 0                | 9.8                  | 463                               | 2.8                      | Good        | Low                | 2      | 2.35     |
|             | T36                               | 46,XX,del(12p)  | 3                | 8.3                  | 176                               | 5.5                      | Good        | Low                | 3      | 0.35     |
|             | T37                               | 46,XY,del(20q)  | 0                | 10.2                 | 56                                | 9.7                      | Good        | Very low           | 1,5    | 1.12     |
|             | T38                               | 46,XX           | 0                | 10.3                 | 224                               | 2.4                      | Good        | Very low           | 1      | 1.12     |
| T39         | 46,XY                             | 0               | 6.9              | 164                  | 2.4                               | Good                     | Low         | 2,5                | 2.04   |          |
| T40         | 46,XY                             | 0               | 6.5              | 374                  | 1.1                               | Good                     | Low         | 2,5                | 4.42   |          |
| MDS-EB-1    | P21                               | 46,XX           | 5                | 8.1                  | 193                               | 1.7                      | Good        | Int                | 4      | -4.15    |
|             | P22                               | 46,XY,del(20q)  | 9                | 8.3                  | 63                                | 1.9                      | Good        | Int                | 4,5    | -56.67   |
|             | P23                               | 46, XY          | 6                | 10.5                 | 23                                | 2.3                      | Good        | Int                | 4      | -6.68    |
|             | P24                               | 46,XY           | 5                | 10.7                 | 135                               | 1.0                      | Good        | Low                | 3      | -10.67   |
|             | P25                               | 47,XY,+8        | 5                | 8.5                  | 253                               | 2.0                      | Int         | High               | 5      | -4.48    |
|             | T41                               | 46,XY           | 9                | 10.2                 | 212                               | 1.2                      | Good        | Low                | 3      | -22.35   |
|             | T42                               | 46,XX           | 6                | 7.6                  | 19                                | 1.6                      | Good        | High               | 5,5    | -1.74    |
|             | T43                               | 46,XY           | 5                | 13.2                 | 122                               | 1.6                      | Good        | Low                | 3      | -0.92    |
| T44         | 46,XX,del(11q)                    | 6               | 12.6             | 29                   | 1.8                               | Very good                | Low         | 3                  | -0.49  |          |
| MDS-EB-2    | P26                               | 46,XX           | 15               | 10.5                 | 121                               | 2.4                      | Good        | Int                | 4      | -11.33   |
|             | P27                               | 47,XX,+8        | 17               | 11.7                 | 13                                | 5.8                      | Int         | High               | 6      | -3.13    |
|             | T45                               | 46,XY           | 19               | 8.5                  | 22                                | 1.1                      | Good        | High               | 6      | -5.75    |
|             | T46                               | 46,XX           | 10               | 10.2                 | 67                                | 0.4                      | Good        | Int                | 4      | -5.36    |
|             | T47                               | 46,XX           | 14               | 8.3                  | 52                                | 11.2                     | Good        | High               | 5,5    | -0.05    |
|             | T48                               | 46,XX           | 16               | 8.7                  | 587                               | 0.5                      | Good        | High               | 5,5    | -9.47    |

**Supplemental Table 3: List of transcripts, primers and probes**

| Transcripts  | Primer (forward)           | Primer (reverse)            | Probe     |
|--------------|----------------------------|-----------------------------|-----------|
| SOD1         | gcatcatcaatttcgagcag       | caggccttcagtcagtcctt        | cttcccca  |
| SOD2         | tccactgcaaggaacaacag       | taagcgtgtcccacacat          | ctgctggg  |
| SOD3         | ctctcttttcaggagagaaaagctc  | aacacagtagcgccagcat         | aggagctg  |
| CAT          | cgcagttcggttctccac         | gggtcccgaactgtgtca          | ctccagca  |
| TXN          | ttacagccgctgtcaga          | ggcttcctgaaaagcagtcctt      | ggctgctg  |
| TXN2         | gagacaccagtggttgga         | gcttggccaccatcttctc         | ctggggcc  |
| GLRX         | ggcttctggaattgtcgat        | tgcatccgctatacaatctt        | cagccacc  |
| GLRX2(1)     | gtggcactcgctggaatc         | cgctcgtaaattctcaaagat       | ctccatcc  |
| GLRX2(2)     | gttggtttggagcaggag         | caaagatgatgatgtattgctct     | ggcggcgg  |
| GLRX3        | tcctcaagaaccacgctgt        | tgagaagatatcaaaactgctaaactg | tggtgga   |
| GLRX5        | gtgataactggggcgtgtt        | actcaggcatgcacagca          | ctccagca  |
| GPX1(1)      | caaccagtttggcatcag         | gttcacctcgacttctcg          | ccaccacc  |
| GPX1(2)      | ccctgtttgtggttagaacg       | gagagaagggcagctagaacc       | ctcctct   |
| GPX2         | gtcctggcttccctg            | tgctcaggatctcctcattctg      | caggagaa  |
| GPX3         | cagagatccttctaccctcaa      | cccttctcaaagagctgga         | agggtggag |
| GPX4         | tacggaccatggaggag          | ccacacactgtggagctagaa       | ctgcccga  |
| GPX7         | ccatctgcttcaagtacc         | ttcatctggggctactagg         | ctccttcc  |
| GSR          | tgccagcttaggaataaccag      | cctgcaccaacaatgacg          | gctggaag  |
| PRDX1(1,2,3) | cactgacaacatggggaagt       | ttgctcttttgacatcagg         | ccagccag  |
| PRDX2(1)     | gccttccagtacacagcagag      | gttgggcttaatcgtgtcact       | cttcccca  |
| PRDX2(3)     | gcaactcagatgcaactctatctact | tgaactggagtttccatcttcat     | cagcctcc  |
| PRDX3(1,2)   | ctggacaccggattctccta       | gggtgatctactgattaccttctg    | ctgcttcc  |
| PRDX4        | gcacctaagcaaagcgaaga       | aaattctccatcgatcacagc       | actgggaa  |
| PRDX5(1,3)   | tcctggctgatcccactg         | atgccatcctgtaccaccat        | ctccttcc  |
| PRDX5(2)     | caccttgatgttccaa           | ggacaccagcgaatcatctagt      | ctccttcc  |
| PRDX6        | caatagacagtgttgggaccatc    | tttctgtggctcttcacaa         | gctccagg  |
| GAPDH        | agccacatcgctcagacac        | gccaatacgaaccaatcc          | cttcccca  |
| ACTB         | attggcaatgagcggctc         | cgtaggatccacaggact          | gctggaag  |
| B2M          | ttctggcctggaggctatc        | tcaggaaattgactttccattc      | ccagccgc  |

**Supplemental Table 4:** Statistical analyses of ROS levels in bone marrow cells (Kruskal-Wallis followed by Dunn post hoc test vs. healthy controls)

| Disease                      | <i>P</i> -value (vs . healthy controls) |
|------------------------------|-----------------------------------------|
| <b>CD34pos cells</b>         |                                         |
| MDS-SLD                      | 0.0286                                  |
| MDS-SLD-RS                   | 0.0468                                  |
| MDS-MLD                      | 0.0013                                  |
| MDS-MLD-RS                   | 0.0483                                  |
| MDS-EB-1                     | 0.0193                                  |
| MDS-EB-2                     | 0.0352                                  |
| sAML                         | 0.0009                                  |
| <b>CD34pos CD38low cells</b> |                                         |
| MDS-SLD                      | 0.0352                                  |
| MDS-SLD-RS                   | 0.0392                                  |
| MDS-MLD                      | 0.0419                                  |
| MDS-MLD-RS                   | 0.0265                                  |
| MDS-EB-1                     | 0.0452                                  |
| MDS-EB-2                     | 0.0422                                  |
| sAML                         | 0.0065                                  |

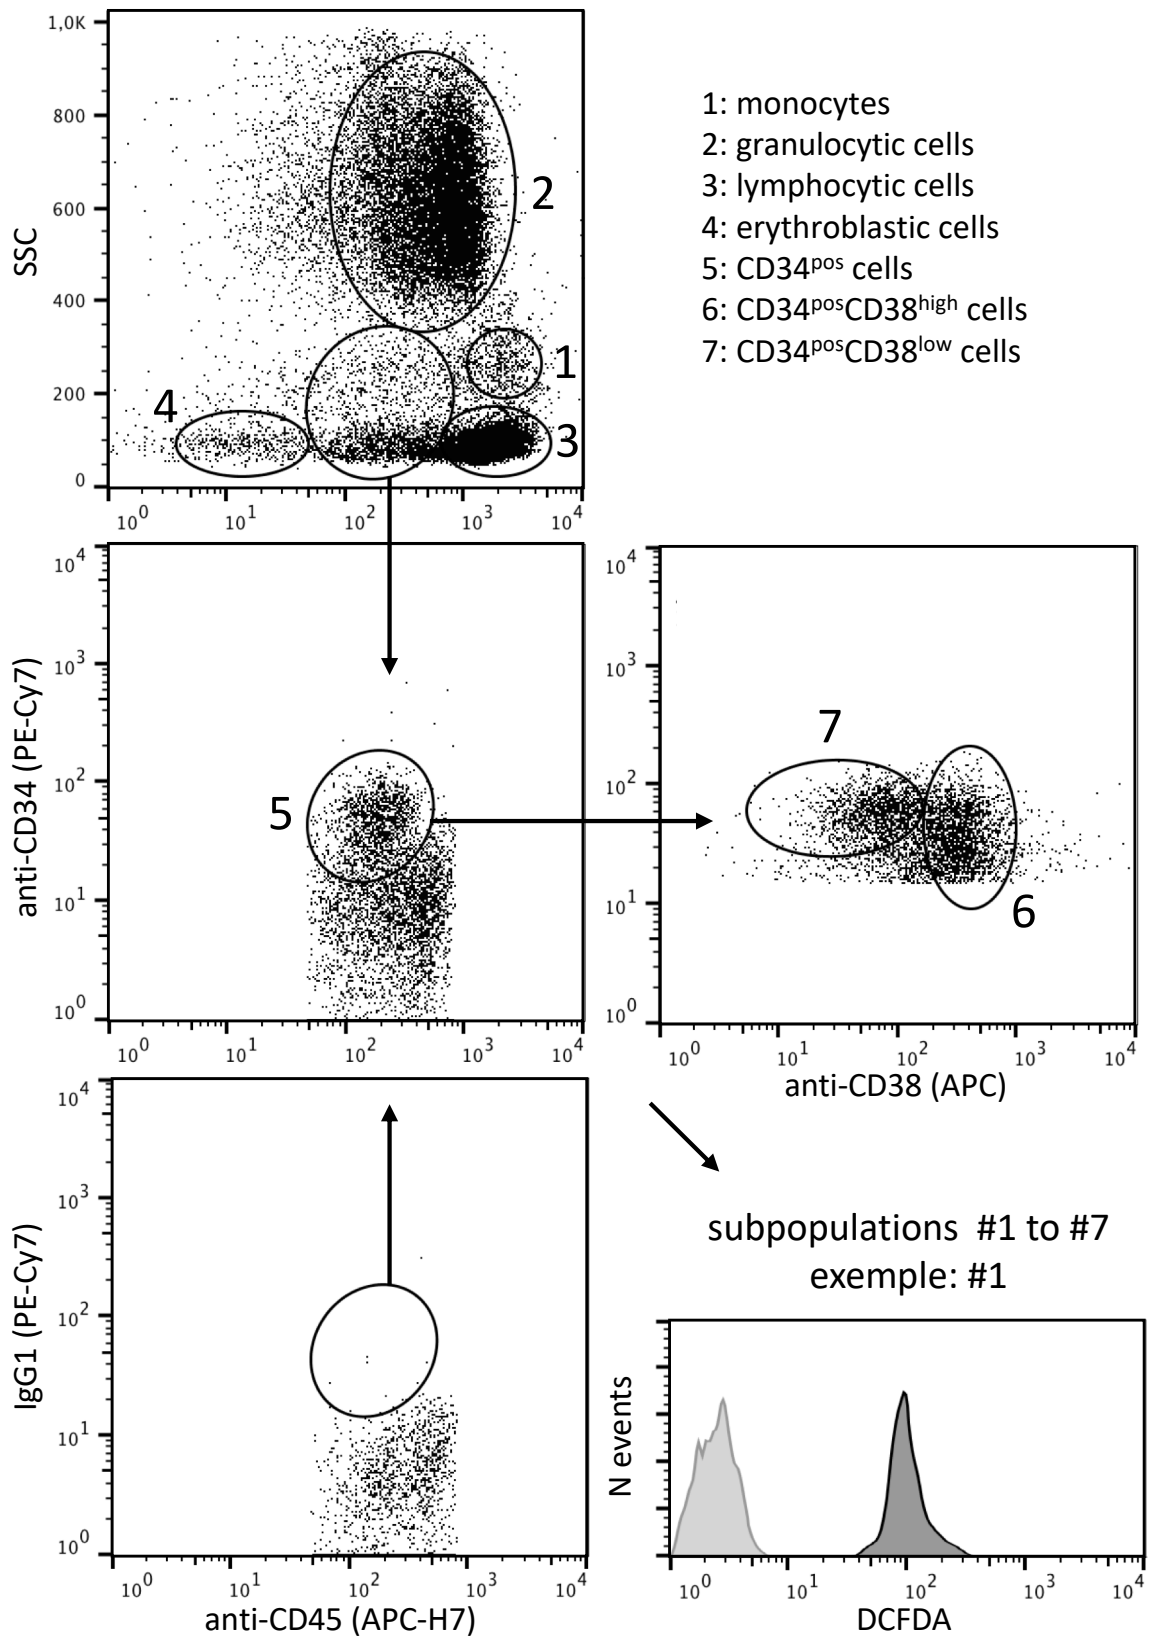

Supplemental Figure 1

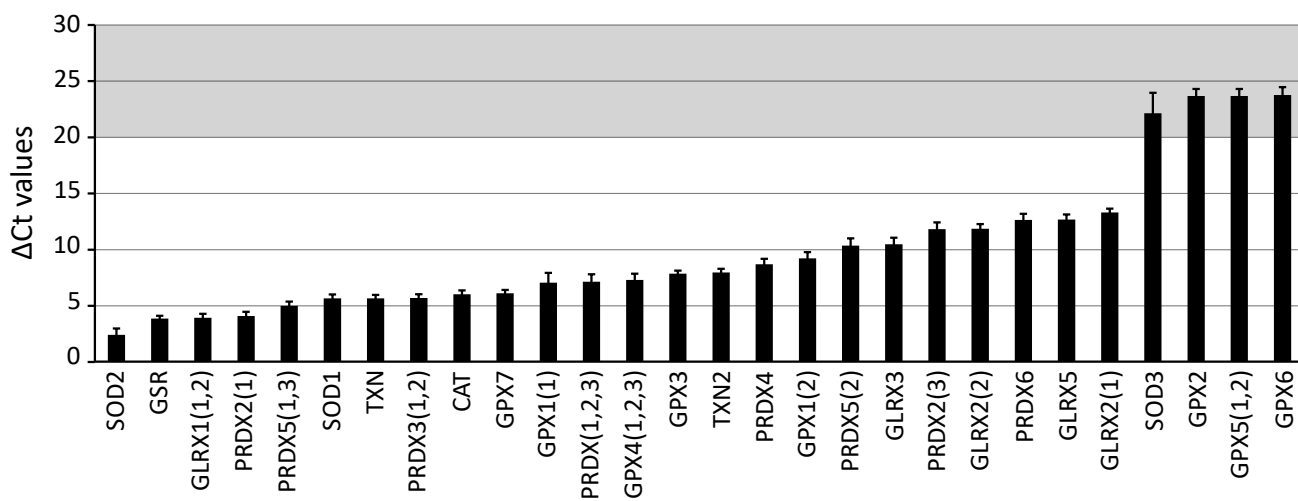

Supplemental Figure 2

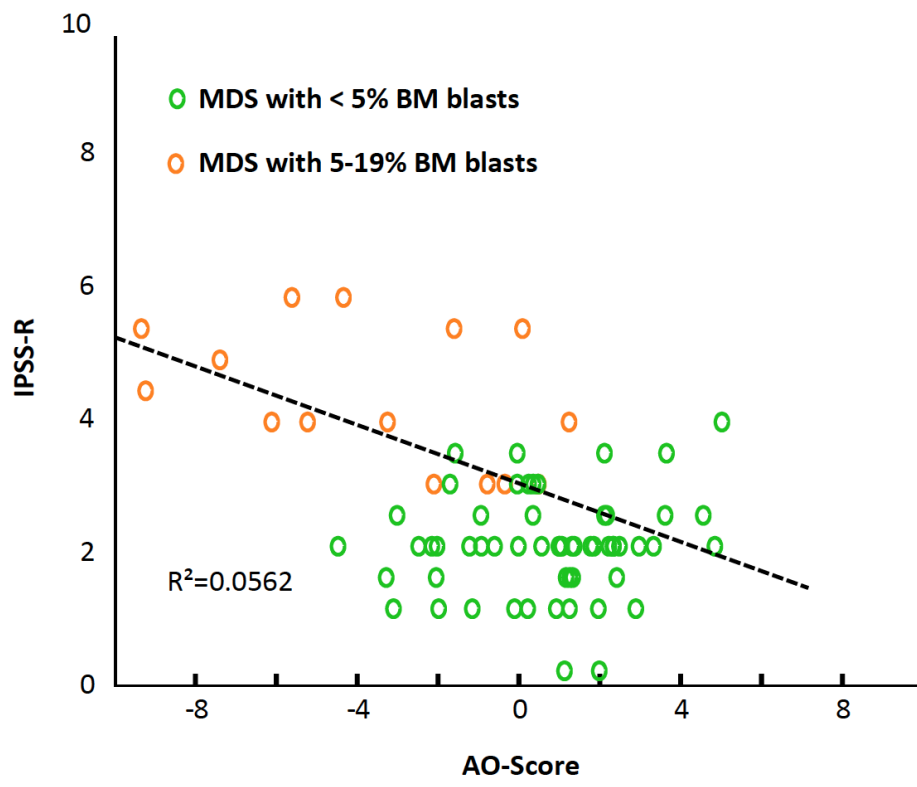

Supplemental Figure 3
